# Supplementary material
Source: Springer Nature journal article supplement (https://www.springermedizin.de/resource/supplementary/13618_2011_20_MOESM6_ESM.pdf/9680974)

**A**1 mM SNAP, H<sub>2</sub> (-)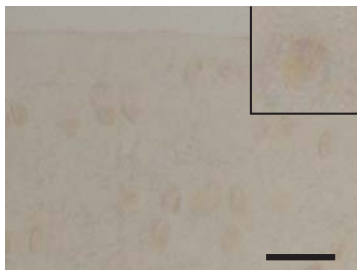1 mM SNAP, H<sub>2</sub> (+)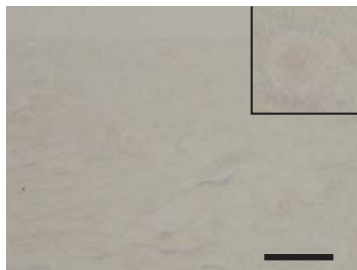0 mM SNAP, H<sub>2</sub> (-)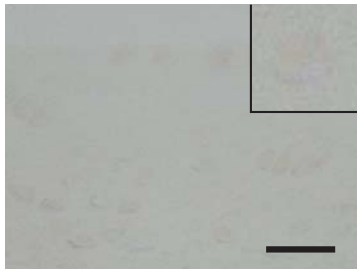1 mM SIN-1, H<sub>2</sub> (-)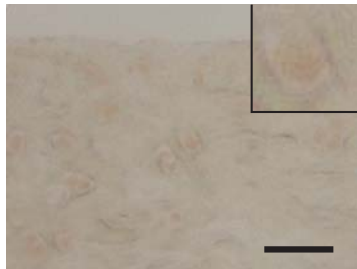**B**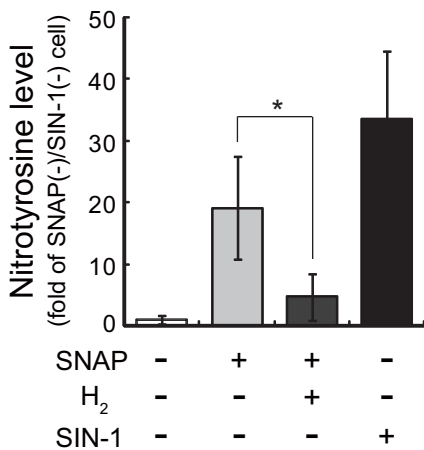

Supplement: MOESM6 [file 9680974]
